# Supplementary material for: Hepatic energy state is regulated by glucagon receptor signaling in mice
Source: JCI journal article supplement (doi:10.1172/jci38650), 2009-07-07
Supplement: sd1 [file 1]

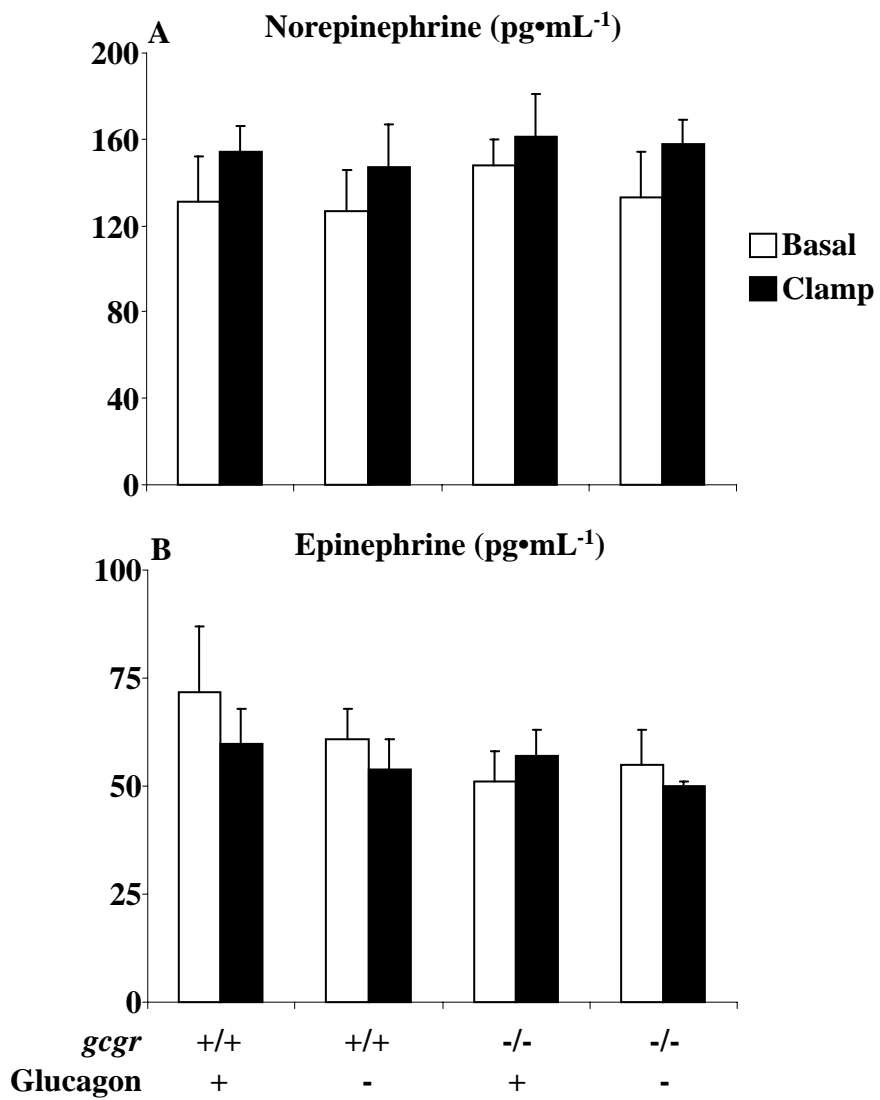

Supplementary Figure 1 – Basal and clamp (A) norepinephrine and (B) epinephrine measured by HPLC in 5h fasted, 12 week-old wild-type (*gcgr*<sup>+/+</sup>) and glucagon receptor null (*gcgr*<sup>-/-</sup>) littermate mice on a C57BL/6 background during a hyperglucagonemic-euglycemic clamp (n = 7-9 in each group). At t = -60 min (equilibration), mice were infused with phloridzin (80  $\mu\text{g}\cdot\text{kg}^{-1}\cdot\text{min}^{-1}$ ) and a variable GIR to achieve and maintain euglycemia ( $\sim 8.0\text{ mmol}\cdot\text{L}^{-1}$ ). At t = 0 min, glucagon (10  $\text{ng}\cdot\text{kg}^{-1}\cdot\text{min}^{-1}$ ) was infused during a 120 min experimental period. Blood glucose was measured every 5 min during equilibration and every 10 min during the experimental period. Basal samples taken at t = -15 min. Clamp samples taken at t = 110 min.

|           | ATP       | ADP       | AMP       | TAN       | AMP:ATP   | EC        |
|-----------|-----------|-----------|-----------|-----------|-----------|-----------|
| Fed       | 6.21±0.31 | 1.04±0.05 | 0.21±0.05 | 7.45±0.25 | 0.04±0.01 | 0.90±0.02 |
| 18h Fast  | 6.04±0.41 | 1.11±0.09 | 0.36±0.09 | 7.34±0.36 | 0.04±0.01 | 0.91±0.03 |
|           |           |           |           |           |           |           |
| Sedentary | 6.06±0.24 | 1.15±0.09 | 0.34±0.06 | 7.07±0.39 | 0.04±0.01 | 0.91±0.04 |
| Exercise  | 5.87±0.32 | 1.08±0.12 | 0.56±0.13 | 7.21±0.44 | 0.05±0.01 | 0.88±0.06 |
|           |           |           |           |           |           |           |
| Vehicle   | 5.59±0.49 | 1.11±0.13 | 0.38±0.19 | 7.08±0.43 | 0.12±0.06 | 0.85±0.03 |
| STZ       | 5.58±0.47 | 0.96±0.11 | 0.57±0.23 | 7.11±0.33 | 0.07±0.04 | 0.88±0.03 |
|           |           |           |           |           |           |           |
| Chow      | 5.02±0.28 | 1.11±0.10 | 0.24±0.04 | 6.37±0.28 | 0.05±0.01 | 0.87±0.01 |
| HFD       | 4.42±0.17 | 1.13±0.10 | 0.22±0.06 | 6.07±0.28 | 0.05±0.01 | 0.87±0.01 |

Supplementary Table 1 – Skeletal muscle (gastrocnemius) adenine nucleotides measured by HPLC in mice following a 5 or 18h fast (n = 6-8/group); maximal treadmill exercise (start 10 m•min<sup>-1</sup> + 4 m•min<sup>-1</sup> every 3 min after 5h fast; n = 6-8/group); streptozotocin-induced diabetes (1 injection s.c. 150 mg•kg<sup>-1</sup>; n = 6/group) or vehicle-injected control mice fasted for 5h; and high-fat diet fed (HFD; 60% fat by kcal for 9 wks) or chow fed control mice fasted for 5h (n = 4/group). Total adenine nucleotide (TAN) content is the sum of ATP+ADP+AMP. Hepatic AMP:ATP and energy charge [EC = (ATP+½ADP)+(ATP+ADP+AMP)] are shown for each condition. All mice were 12 weeks of age and on a C57BL/6 background

|                            | AMP       | ADP       | AMP       | TAN       | AMP:ATP   | EC        |
|----------------------------|-----------|-----------|-----------|-----------|-----------|-----------|
| <i>Gcgr</i> <sup>+/+</sup> |           |           |           |           |           |           |
| Saline                     | 6.35±0.24 | 1.07±0.09 | 0.25±0.07 | 7.55±0.32 | 0.05±0.01 | 0.94±0.02 |
| Glucagon                   | 6.61±0.14 | 1.16±0.10 | 0.28±0.12 | 7.41±0.28 | 0.06±0.01 | 0.95±0.03 |
| <i>Gcgr</i> <sup>-/-</sup> |           |           |           |           |           |           |
| Saline                     | 6.09±0.41 | 1.19±0.17 | 0.19±0.05 | 7.24±0.39 | 0.05±0.01 | 0.94±0.04 |
| Glucagon                   | 6.25±0.28 | 0.99±0.09 | 0.29±0.03 | 7.44±0.53 | 0.05±0.01 | 0.95±0.05 |

Supplementary Table 2 – Skeletal muscle (gastrocnemius) adenine nucleotides measured by HPLC in 5h fasted, 12 week-old wild-type (*gcgr*<sup>+/+</sup>) and glucagon receptor null (*gcgr*<sup>-/-</sup>) littermate mice on a C57BL/6 background following a hyperglucagonemic-euglycemic clamp (n = 7-9 in each group). Total adenine nucleotide (TAN) content is the sum of ATP+ADP+AMP. Hepatic AMP:ATP and energy charge [EC = (ATP+½ADP)+(ATP+ADP+AMP)] are shown for each condition.
